# Supplementary material
Source: MDPI journal article supplement (https://www.mdpi.com/2076-3271/10/3/45)

Figure S1. Original Western Blot.

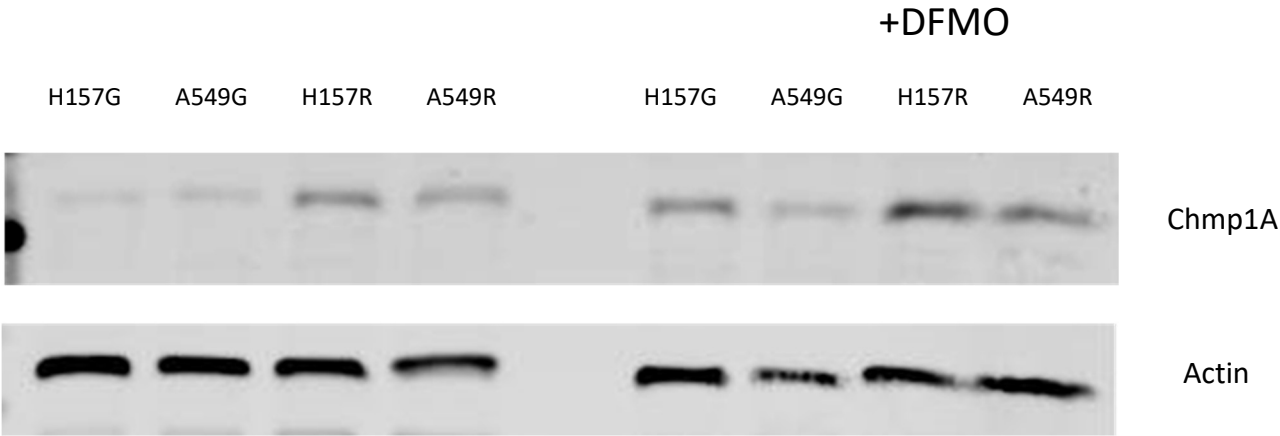

Supplement: s1 [file s1]
